# Supplementary material
Source: PubMed Central journal article supplement (PMC6170807)
Supplement: rspb20181535supp3.pdf [file rspb20181535supp3.pdf]

**Supplementary Material** for Schneider *et al.* (2018) — Punctuated plastome reduction and host-parasite horizontal gene transfer in the holoparasitic plant genus *Aphyllon*  
*Proceedings of the Royal Society B*, doi:10.1098/rspb.2018.1535

**Table S1.** Illumina sequencing results and herbarium vouchers.

| <b>Taxon</b>                                       | <b>Raw Reads</b> | <b>Trimmed Reads</b> | <b>NCBI Sequence Read Archive Accession Number</b> | <b>Voucher</b>                     |
|----------------------------------------------------|------------------|----------------------|----------------------------------------------------|------------------------------------|
| <i>A. epigalium</i> subsp. <i>epigalium</i>        | 16 901 246       | 15 692 690           | SAMN09484479                                       | Colwell 07-53 (YM)                 |
| <i>A. epigalium</i> subsp. <i>notocalifornicum</i> | 16 311 192       | 14 523 858           | SAMN09484484                                       | Bell 159 (SD 136414)               |
| <i>A.</i> “franciscanum”                           | 19 655 426       | 18 819 822           | SAMN09484483                                       | Schneider 468 (JEPS 127839)        |
| <i>A.</i> “franciscanum”                           | 13 383 314       | 12 731 722           | SAMN09484482                                       | Colwell 02-09 (WTU 351387)         |
| <i>A. fasciculatum</i>                             | 8 277 864        | 6 343 024            | SAMN09484478                                       | H. L. Merner s.n. (WIS282500)      |
| <i>A. fasciculatum</i>                             | 13 240 916       | 12 566 132           | SAMN09484480                                       | Batten and Dawe 78-279 (ALAv85753) |
| <i>A. purpureum</i>                                | 26 534 420       | 25 111 384           | SAMN09484481                                       | Colwell 04-63 (YM 118104)          |
| <i>A. uniflorum</i>                                | 16 447 094       | 15 730 492           | SAMN09484477                                       | R. Lipkin et al. (ALAv156078)      |
