# Supplementary material
Source: PubMed Central journal article supplement (PMC6170807)
Supplement: rspb20181535supp4.pdf [file rspb20181535supp4.pdf]

**Supplementary Material** for Schneider *et al.* (2018)

— Punctuated plastome reduction and host-parasite horizontal gene transfer in the holoparasitic plant genus *Aphyllon* —  
*Proceedings of the Royal Society B*, doi:10.1098/rspb.2018.1535

**Table S2.** GenBank accession numbers for *A. epigalium* plastomes, partial mitochondrial genomes, and *rbcL* sequences used in this study. Sequences reported for the first time in this study are also accompanied by voucher information, the source of DNA used, and sequencing method (Sanger or Illumina).

| <b>Phylogeny Tip Label [species (collector)]</b>                          | <b>GenBank ID</b> | <b>DNA source</b>     | <b>Sequence Source</b> | <b>Voucher</b> |
|---------------------------------------------------------------------------|-------------------|-----------------------|------------------------|----------------|
| <i>A. bulbosum</i> (Colwell 03-08)                                        | MG954039          | Schneider et al. 2016 | Illumina               | JEPS126150     |
| <i>A. californicum</i> subsp. <i>californicum</i> (Colwell 99-77)         | MG954041          | Schneider et al. 2016 | Illumina               | WTU344846      |
| <i>A. chilense</i> (Long 2240)                                            | MG954042          | Schneider et al. 2016 | Illumina               | UC2046156      |
| <i>A. cooperi</i> (Colwell 01-01)                                         | MG954043          | Schneider et al. 2016 | Illumina               | WTU344743      |
| <i>A. dugesii</i> (Santana 5977)                                          | MG954044          | Schneider et al. 2016 | Illumina               | WIS282502      |
| <i>A. “franciscanum”</i> (Colwell 99-CA-RCRS)                             | MG954003          | Schneider et al. 2016 | Illumina               | WTU344759      |
| <i>A. epigalium</i> subsp. <i>epigalium</i> (Colwell 07-53)               | MH129026          | Schneider et al. 2016 | Illumina +<br>Sanger   | YM             |
| <i>A. epigalium</i> subsp. <i>notocalifornicum</i> (Bell 159)             | MG987142          | Schneider et al. 2016 | Illumina +<br>Sanger   | SD136414       |
| <i>A. epigalium</i> subsp. <i>epigalium</i> (Colwell 10-107)              | MG954004          | Schneider et al. 2016 | Sanger                 | YM             |
| <i>A. epigalium</i> subsp. <i>epigalium</i> (Cox 188)                     | MG954005          | Schneider et al. 2016 | Sanger                 | CHSC12931      |
| <i>A. epigalium</i> subsp. <i>epigalium</i> (Harvey s.n.)                 | MG954006          | Schneider et al. 2016 | Sanger                 | UC             |
| <i>A. epigalium</i> subsp. <i>notocalifornicum</i> (Bell 159)<br>plastome | MH050785          | Schneider et al. 2016 | Illumina               | SD136414       |
| <i>A. epigalium</i> subsp. <i>epigalium</i> (Colwell 07-53)<br>plastome   | MH050786          | Schneider et al. 2016 | Illumina               | YM             |
| <i>A. fasciculatum</i> (Batten 78-279)                                    | MG954051          | Schneider et al. 2016 | Illumina               | ALAv85763      |
| <i>A. fasciculatum</i> (Merner s.n.)                                      | MG954052          | Schneider et al. 2016 | Illumina               | WIS282500      |
| <i>A. ludovicianum</i> (Colwell 01-114)                                   | MG954045          | Schneider et al. 2016 | Illumina               | WTU351399      |
| <i>A. parishii</i> subsp. <i>parishii</i> (Colwell 03-53)                 | MG954046          | Schneider et al. 2016 | Illumina               | JEPS126149     |
| <i>A. purpureum</i> (Colwell 04-63)                                       | MG954053          | Schneider et al. 2016 | Illumina               | YM118104       |

**Supplementary Material** for Schneider *et al.* (2018)

— Punctuated plastome reduction and host-parasite horizontal gene transfer in the holoparasitic plant genus *Aphyllon* —  
*Proceedings of the Royal Society B*, doi:10.1098/rspb.2018.1535

|                                                                           |          |                       |                      |            |
|---------------------------------------------------------------------------|----------|-----------------------|----------------------|------------|
| <i>A. arizonicum</i> (Halse 897)                                          | MG954026 | Schneider et al. 2016 | Sanger               | ARIZ187291 |
| <i>A. bulbosum</i> (Colwell 03-08)                                        | MG954039 | Schneider et al. 2016 | Illumina             | JEPS126150 |
| <i>A. californicum</i> subsp. <i>californicum</i> (Colwell 97-CA-BLO)     | MG954027 | Schneider et al. 2016 | Sanger               | WTU344755  |
| <i>A. californicum</i> subsp. <i>californicum</i> (Colwell 99-77)         | MG954041 | Schneider et al. 2016 | Illumina             | WTU344846  |
| <i>A. californicum</i> subsp. <i>condensum</i> (Taylor 18565)             | MG954028 | Schneider et al. 2016 | Sanger               | JEPS100410 |
| <i>A. chilense</i> (Long 2240)                                            | MG954042 | Schneider et al. 2016 | Illumina             | UC2046156  |
| <i>A. cooperi</i> (Colwell 01-01)                                         | MG954043 | Schneider et al. 2016 | Illumina             | WTU344743  |
| <i>A. dugesii</i> (Santana 5977)                                          | MG954044 | Schneider et al. 2016 | Illumina             | WIS282502  |
| <i>A. epigalium</i> subsp. <i>epigalium</i> (Colwell 07-53)               | MH129026 | Schneider et al. 2016 | Illumina +<br>Sanger | YM         |
| <i>A. epigalium</i> subsp. <i>epigalium</i> (Colwell 07-53)<br>plastome   | MH050785 | Schneider et al. 2016 | Illumina             | YM         |
| <i>A. epigalium</i> subsp. <i>epigalium</i> (Colwell 10-107)              | MG954004 | Schneider et al. 2016 | Sanger               | YM         |
| <i>A. epigalium</i> subsp. <i>epigalium</i> (Cox 188)                     | MG954005 | Schneider et al. 2016 | Sanger               | CHSC12931  |
| <i>A. epigalium</i> subsp. <i>epigalium</i> (Harvey s.n.)                 | MG954006 | Schneider et al. 2016 | Sanger<br>Illumina + | UC         |
| <i>A. epigalium</i> subsp. <i>notocalifornicum</i> (Bell 159) HGT         | MG987142 | Schneider et al. 2016 | Sanger               | SD136414   |
| <i>A. epigalium</i> subsp. <i>notocalifornicum</i> (Bell 159)<br>plastome | MH050786 | Schneider et al. 2016 | Illumina             | SD136414   |
| <i>A. fasciculatum</i> (Batten 78-279)                                    | MG954051 | Schneider et al. 2016 | Illumina             | ALAv85763  |
| <i>A. fasciculatum</i> (Colwell 01-95)                                    | MG954029 | Schneider et al. 2016 | Sanger               | WTU351381  |
| <i>A. fasciculatum</i> (Colwell 99-CA-RCRS)                               | MG954003 | Schneider et al. 2016 | Illumina             | WTU344759  |
| <i>A. fasciculatum</i> (Egger 1295)                                       | MG954031 | Schneider et al. 2016 | Sanger               | WTU        |
| <i>A. fasciculatum</i> (Merner s.n.)                                      | MG954052 | Schneider et al. 2016 | Illumina             | WIS282500  |
| <i>A. fasciculatum</i> (Schneider 920)                                    | MG954030 | Schneider et al. 2016 | Sanger               | JEPS122893 |
| <i>A. ludovicianum</i> (Collins 2033)                                     | MG954032 | Schneider et al. 2016 | Sanger               | UC 2046173 |
| <i>A. ludovicianum</i> (Colwell 01-114)                                   | MG954045 | Schneider et al. 2016 | Illumina             | WTU351399  |

**Supplementary Material** for Schneider *et al.* (2018)

— Punctuated plastome reduction and host-parasite horizontal gene transfer in the holoparasitic plant genus *Aphyllon* —  
*Proceedings of the Royal Society B*, doi:10.1098/rspb.2018.1535

|                                                                   |          |                            |          |                        |
|-------------------------------------------------------------------|----------|----------------------------|----------|------------------------|
| <i>A. multiflorum</i> (Collins 2024)                              | MG954034 | Schneider et al. 2016      | Sanger   | MO5990497              |
| <i>A. parishii</i> subsp. <i>parishii</i> (Colwell 03-53)         | MG954046 | Schneider et al. 2016      | Illumina | JEPS126149             |
| <i>A. pinorum</i> (Colwell 96-WA-LC)                              | MG954035 | Schneider et al. 2016      | Sanger   | WTU344760              |
| <i>A. purpureum</i> (Colwell 04-63)                               | MG954053 | Schneider et al. 2016      | Illumina | YM118104               |
| <i>A. purpureum</i> (Colwell 14-11)                               | MG954055 | Schneider et al. 2016      | Illumina | JEPS126167             |
| <i>A. purpureum</i> (Filey 91)                                    | MG954054 | Schneider et al. 2016      | Illumina | WS285758               |
| <i>A. riparium</i> (Collins 1620)                                 | MG954036 | Schneider et al. 2016      | Sanger   | MO4903216              |
| <i>A. riparium</i> (Collins 1622)                                 | MG954048 | Schneider et al. 2016      | Illumina | MO5933323              |
| <i>A. robbinsii</i> (Schneider 293)                               | MG954049 | Schneider et al. 2016      | Illumina | JEPS<br>ARIZ<br>264197 |
| <i>A. sp. nov.</i> (Yatskyevich 85-215)                           | MG954033 | Schneider et al. 2016      | Sanger   | 264197                 |
| <i>A. tarapacanam</i> (Ricardi 3326)                              | MG954050 | Schneider et al. 2016      | Illumina | CONC19273              |
| <i>A. uniflorum</i> (Anderson 2267)                               | MG954037 | Schneider et al. 2016      | Sanger   | MIN409677              |
| <i>A. uniflorum</i> (Lipkin 04-324)                               | MG954056 | Schneider et al. 2016      | Illumina | ALAv156078             |
| <i>A. validum</i> subsp. <i>howellii</i> (Colwell 02-04)          | MG954058 | Schneider et al. 2016      | Illumina | WTU 351386             |
| <i>A. validum</i> subsp. <i>validum</i> (Colwell 99-73)           | MG954038 | Schneider et al. 2016      | Sanger   | WTU344847              |
| <i>A. vallicolum</i> (Schneider 316)                              | MG954059 | Qiagen DNeasy (this study) | Illumina | JEPS121477             |
| <i>Asperula cynanchica</i>                                        | KM360656 |                            | Genbank  |                        |
| <i>Cruciata glabra</i>                                            | X81097   |                            | Genbank  |                        |
| <i>G. album</i>                                                   | X81090   |                            | Genbank  |                        |
| <i>G. ambiguum</i> var. <i>siskiyouense</i> (Soza 1760)           | MG954007 | Soza & Olmstead 2010       | Sanger   | WTU                    |
| <i>G. andrewsii</i> (Bell 159)                                    | MG954002 | Qiagen DNeasy (this study) | Sanger   | SD136414               |
| <i>G. andrewsii</i> subsp. <i>andrewsii</i> (Soza 1729)           | MG954008 | Soza & Olmstead 2010       | Sanger   | WTU                    |
| <i>G. andrewsii</i> subsp. <i>intermedium</i> (Soza 1725b)        | MG954009 | Soza & Olmstead 2010       | Sanger   | WTU                    |
| <i>G. anglicum</i>                                                | MG223563 |                            | Genbank  |                        |
| <i>G. angustifolium</i> subsp. <i>angustifolium</i> (Boyd 11551b) | MG954010 | Soza & Olmstead 2010       | Sanger   | RSA                    |

**Supplementary Material** for Schneider *et al.* (2018)

— Punctuated plastome reduction and host-parasite horizontal gene transfer in the holoparasitic plant genus *Aphyllon* —  
*Proceedings of the Royal Society B*, doi:10.1098/rspb.2018.1535

|                                                            |          |                      |         |          |
|------------------------------------------------------------|----------|----------------------|---------|----------|
| <i>G. anisophyllum</i>                                     | KF602232 |                      | Genbank |          |
| <i>G. aparine</i>                                          | KY562587 |                      | Genbank | SD136414 |
| <i>G. arkansanum</i> (Thomas 7714)                         | MG954011 | Soza & Olmstead 2010 | Sanger  | WTU      |
| <i>G. asprellum</i>                                        | KJ593428 |                      | Genbank |          |
| <i>G. bifolium</i>                                         | MG222058 |                      | Genbank |          |
| <i>G. bolanderi</i> (Soza 1758a)                           | MG954012 | Soza & Olmstead 2010 | Sanger  | WTU      |
| <i>G. boreale</i>                                          | JX848534 |                      | Genbank |          |
| <i>G. boreale</i> subsp. <i>septentrionale</i> (Soza 1755) | MG954013 | Soza & Olmstead 2010 | Sanger  | WTU      |
| <i>G. brandegeii</i>                                       | MG221966 |                      | Genbank |          |
| <i>G. brevipes</i>                                         | MG221335 |                      | Genbank |          |
| <i>G. californicum</i> subsp. <i>flaccidum</i> (Soza 1731) | MG954014 | Soza & Olmstead 2010 | Sanger  | WTU      |
| <i>G. circaezans</i>                                       | KP402639 |                      | Genbank |          |
| <i>G. clementis</i> (Wilken & Painter 16123)               | MG954015 | Soza & Olmstead 2010 | Sanger  | RSA      |
| <i>G. cliftonsmitthii</i> (Soza 1720)                      | MG954016 | Soza & Olmstead 2010 | Sanger  | WTU      |
| <i>G. concinnum</i>                                        | KP643725 |                      | Genbank |          |
| <i>G. corsicum</i>                                         | X81096   |                      | Genbank |          |
| <i>G. elongatum</i>                                        | X81098   |                      | Genbank |          |
| <i>G. grande</i> (Soza 1733b)                              | MG954017 | Soza & Olmstead 2010 | Sanger  | WTU      |
| <i>G. grayanum</i> (Ertter & Schoolcraft 8641)             | MG954018 | Soza & Olmstead 2010 | Sanger  | WTU      |
| <i>G. hallii</i> (Soza 1724a)                              | MG954019 | Soza & Olmstead 2010 | Sanger  | WTU      |
| <i>G. hispidulum</i>                                       | KJ773530 |                      | Genbank |          |
| <i>G. kamtschaticum</i>                                    | MG221781 |                      | Genbank |          |
| <i>G. labradoricum</i>                                     | MG223948 |                      | Genbank |          |
| <i>G. lanceolatum</i>                                      | HQ590110 |                      | Genbank |          |
| <i>G. lucidum</i>                                          | X81100   |                      | Genbank |          |
| <i>G. megalospermum</i>                                    | KF60223  |                      | Genbank |          |
| <i>G. mollugo</i>                                          | AY395538 |                      | Genbank |          |

**Supplementary Material** for Schneider *et al.* (2018)

— Punctuated plastome reduction and host-parasite horizontal gene transfer in the holoparasitic plant genus *Aphyllon* —  
*Proceedings of the Royal Society B*, doi:10.1098/rspb.2018.1535

|                                                                      |          |                              |          |            |
|----------------------------------------------------------------------|----------|------------------------------|----------|------------|
| <i>G. multiflorum</i>                                                | MG221437 |                              | Genbank  |            |
| <i>G. nuttallii</i> subsp. <i>nuttallii</i> (Roberts & Bramlet 6036) | MG954020 | Soza & Olmstead 2010         | Sanger   | RSA        |
| <i>G. obtusum</i>                                                    | MG222026 |                              | Genbank  |            |
| <i>G. odoratum</i>                                                   | KY562701 |                              | Genbank  |            |
| <i>G. oreganum</i> (Soza 1761)                                       | MG954021 | Soza & Olmstead 2010         | Sanger   | WTU        |
| <i>G. palustre</i>                                                   | X81101   |                              | Genbank  |            |
| <i>G. parisiense</i>                                                 | HM850021 |                              | Genbank  |            |
| <i>G. pilosum</i>                                                    | KJ773531 |                              | Genbank  |            |
| <i>G. porrigens</i> (Fraga 1281b)                                    | MG954022 | Soza & Olmstead 2010         | Sanger   | RSA        |
| <i>G. proliferum</i> (Turner 24-155)                                 | MG954023 | Soza & Olmstead 2010         | Sanger   | LL/TEX     |
| <i>G. pusillosetosum</i>                                             | KX910849 |                              | Genbank  |            |
| <i>G. rotundifolium</i> (Montserrat <i>et al.</i> s.n.)              | MG954024 | Soza & Olmstead 2010         | Sanger   | JACA       |
| <i>G. saxatile</i>                                                   | HM850022 |                              | Genbank  |            |
| <i>G. scabrum</i>                                                    | X81105   |                              | Genbank  |            |
| <i>G. spurium</i>                                                    | MG222097 |                              | Genbank  |            |
| <i>G. sternerii</i>                                                  | JN891489 |                              | Genbank  |            |
| <i>G. sylvaticum</i>                                                 | MG223156 |                              | Genbank  |            |
| <i>G. tinctorium</i>                                                 | HQ590114 |                              | Genbank  |            |
| <i>G. tricorne</i>                                                   | KP098254 |                              | Genbank  |            |
| <i>G. uliginosum</i>                                                 | JN892892 |                              | Genbank  |            |
| <i>G. uncinulatum</i> (Soza & Yuan 1780)                             | MG954025 | Soza & Olmstead 2010         | Sanger   | WTU        |
| <i>G. valdepilosum</i>                                               | KJ746286 |                              | Genbank  |            |
| <i>G. verum</i>                                                      | HQ590115 |                              | Genbank  |            |
| <i>Helianthus annuus</i>                                             | KM360812 |                              | Genbank  |            |
| <i>Nerium oleander</i>                                               | HM850198 |                              | Genbank  |            |
| <i>Orobanche hederæ</i> (Schneider 124)                              | MG954057 | Schneider <i>et al.</i> 2016 | Illumina | JEPS121581 |
| <i>Rubia sylvatica</i>                                               | KP098247 |                              | Genbank  |            |

**Supplementary Material** for Schneider *et al.* (2018)

— Punctuated plastome reduction and host-parasite horizontal gene transfer in the holoparasitic plant genus *Aphyllon* —  
*Proceedings of the Royal Society B*, doi:10.1098/rspb.2018.1535

|                                                                   |          |                            |          |            |
|-------------------------------------------------------------------|----------|----------------------------|----------|------------|
| <i>Salvia brandegii</i>                                           | AY570398 |                            | Genbank  |            |
| <i>Syringa vulgaris</i>                                           | KM361002 |                            | Genbank  |            |
| <i>A. purpureum</i> (Filey 91)                                    | MG954054 | Schneider et al. 2016      | Illumina | WS285758   |
| <i>A. riparium</i> (Collins 1622)                                 | MG954048 | Schneider et al. 2016      | Illumina | MO5933323  |
| <i>A. robbinsii</i> (Schneider 293)                               | MG954049 | Schneider et al. 2016      | Illumina | JEPS       |
| <i>A. tarapacatum</i> (Ricardi 3326)                              | MG954050 | Schneider et al. 2016      | Illumina | CONC19273  |
| <i>A. purpureum</i> (Colwell 14-11)                               | MG954055 | Schneider et al. 2016      | Illumina | JEPS126167 |
| <i>A. uniflorum</i> (Lipkin 04-324)                               | MG954056 | Schneider et al. 2016      | Illumina | ALAv156078 |
| <i>A. validum</i> subsp. <i>howellii</i> (Colwell 02-04)          | MG954058 | Schneider et al. 2016      | Illumina | WTU 351386 |
| <i>A. vallicolum</i> (Schneider 316)                              | MG954059 | Qiagen DNeasy (this study) | Illumina | JEPS121477 |
| <i>Asperula cynanchica</i>                                        | KM360656 |                            | Genbank  |            |
| <i>G. mollugo</i>                                                 | AY395538 |                            | Genbank  |            |
| <i>Cruciata glabra</i>                                            | X81097   |                            | Genbank  |            |
| <i>G. andrewsii</i> (Bell 159)                                    | MG954002 | Qiagen DNeasy (this study) | Sanger   | SD136414   |
| <i>G. ambiguum</i> var. <i>siskiyouense</i> (Soza 1760)           | MG954007 | Soza & Olmstead 2010       | Sanger   | WTU        |
| <i>G. andrewsii</i> subsp. <i>andrewsii</i> (Soza 1729)           | MG954008 | Soza & Olmstead 2010       | Sanger   | WTU        |
| <i>G. andrewsii</i> subsp. <i>intermedium</i> (Soza 1725b)        | MG954009 | Soza & Olmstead 2010       | Sanger   | WTU        |
| <i>G. angustifolium</i> subsp. <i>angustifolium</i> (Boyd 11551b) | MG954010 | Soza & Olmstead 2010       | Sanger   | RSA        |
| <i>G. aparine</i>                                                 | KY562587 |                            | Genbank  | SD136414   |
| <i>G. arkansanum</i> (Thomas 7714)                                | MG954011 | Soza & Olmstead 2010       | Sanger   | WTU        |
| <i>G. bolanderi</i> (Soza 1758a)                                  | MG954012 | Soza & Olmstead 2010       | Sanger   | WTU        |
| <i>G. boreale</i> subsp. <i>septentrionale</i> (Soza 1755)        | MG954013 | Soza & Olmstead 2010       | Sanger   | WTU        |
| <i>G. californicum</i> subsp. <i>flaccidum</i> (Soza 1731)        | MG954014 | Soza & Olmstead 2010       | Sanger   | WTU        |
| <i>G. clementis</i> (Wilken & Painter 16123)                      | MG954015 | Soza & Olmstead 2010       | Sanger   | RSA        |
| <i>G. cliftonsmitthii</i> (Soza 1720)                             | MG954016 | Soza & Olmstead 2010       | Sanger   | WTU        |
| <i>G. grande</i> (Soza 1733b)                                     | MG954017 | Soza & Olmstead 2010       | Sanger   | WTU        |

**Supplementary Material** for Schneider *et al.* (2018)

— Punctuated plastome reduction and host-parasite horizontal gene transfer in the holoparasitic plant genus *Aphyllon* —  
*Proceedings of the Royal Society B*, doi:10.1098/rspb.2018.1535

|                                                                      |          |                      |         |        |
|----------------------------------------------------------------------|----------|----------------------|---------|--------|
| <i>G. grayanum</i> (Ertter & Schoolcraft 8641)                       | MG954018 | Soza & Olmstead 2010 | Sanger  | WTU    |
| <i>G. hallii</i> (Soza 1724a)                                        | MG954019 | Soza & Olmstead 2010 | Sanger  | WTU    |
| <i>G. nuttallii</i> subsp. <i>nuttallii</i> (Roberts & Bramlet 6036) | MG954020 | Soza & Olmstead 2010 | Sanger  | RSA    |
| <i>G. oreganum</i> (Soza 1761)                                       | MG954021 | Soza & Olmstead 2010 | Sanger  | WTU    |
| <i>G. porrigens</i> (Fraga 1281b)                                    | MG954022 | Soza & Olmstead 2010 | Sanger  | RSA    |
| <i>G. proliferum</i> (Turner 24-155)                                 | MG954023 | Soza & Olmstead 2010 | Sanger  | LL/TEX |
| <i>G. rotundifolium</i> (Montserrat <i>et al.</i> s.n.)              | MG954024 | Soza & Olmstead 2010 | Sanger  | JACA   |
| <i>G. uncinulatum</i> (Soza & Yuan 1780)                             | MG954025 | Soza & Olmstead 2010 | Sanger  | WTU    |
| <i>Helianthus annuus</i>                                             | KM360812 |                      | Genbank |        |
| <i>G. parisiense</i>                                                 | HM850021 |                      | Genbank |        |
| <i>G. saxatile</i>                                                   | HM850022 |                      | Genbank |        |
| <i>G. lanceolatum</i>                                                | HQ590110 |                      | Genbank |        |
| <i>G. tinctorium</i>                                                 | HQ590114 |                      | Genbank |        |
| <i>G. verum</i>                                                      | HQ590115 |                      | Genbank |        |
| <i>G. sternerii</i>                                                  | JN891489 |                      | Genbank |        |
| <i>G. uliginosum</i>                                                 | JN892892 |                      | Genbank |        |
| <i>G. boreale</i>                                                    | JX848534 |                      | Genbank |        |
| <i>G. anisophyllum</i>                                               | KF602232 |                      | Genbank |        |
| <i>G. megalospermum</i>                                              | KF60223  |                      | Genbank |        |
| <i>G. asprellum</i>                                                  | KJ593428 |                      | Genbank |        |
| <i>G. valdepilosum</i>                                               | KJ746286 |                      | Genbank |        |
| <i>G. hispidulum</i>                                                 | KJ773530 |                      | Genbank |        |
| <i>G. pilosum</i>                                                    | KJ773531 |                      | Genbank |        |
| <i>G. tricorne</i>                                                   | KP098254 |                      | Genbank |        |
| <i>G. circaezans</i>                                                 | KP402639 |                      | Genbank |        |
| <i>G. concinnum</i>                                                  | KP643725 |                      | Genbank |        |
| <i>G. pusillosetosum</i>                                             | KX910849 |                      | Genbank |        |

**Supplementary Material** for Schneider *et al.* (2018)

— Punctuated plastome reduction and host-parasite horizontal gene transfer in the holoparasitic plant genus *Aphyllon* —  
*Proceedings of the Royal Society B*, doi:10.1098/rspb.2018.1535

|                                                                       |          |                       |          |                    |
|-----------------------------------------------------------------------|----------|-----------------------|----------|--------------------|
| <i>G. odoratum</i>                                                    | KY562701 |                       | Genbank  |                    |
| <i>G. brevipes</i>                                                    | MG221335 |                       | Genbank  |                    |
| <i>G. multiflorum</i>                                                 | MG221437 |                       | Genbank  |                    |
| <i>G. kamtschaticum</i>                                               | MG221781 |                       | Genbank  |                    |
| <i>G. brandegeii</i>                                                  | MG221966 |                       | Genbank  |                    |
| <i>G. obtusum</i>                                                     | MG222026 |                       | Genbank  |                    |
| <i>G. bifolium</i>                                                    | MG222058 |                       | Genbank  |                    |
| <i>G. spurium</i>                                                     | MG222097 |                       | Genbank  |                    |
| <i>G. sylvaticum</i>                                                  | MG223156 |                       | Genbank  |                    |
| <i>G. anglicum</i>                                                    | MG223563 |                       | Genbank  |                    |
| <i>G. labradoricum</i>                                                | MG223948 |                       | Genbank  |                    |
| <i>Nerium oleander</i>                                                | HM850198 |                       | Genbank  |                    |
| <i>A. arizonicum</i> (Halse 897)                                      | MG954026 | Schneider et al. 2016 | Sanger   | ARIZ187291         |
| <i>A. californicum</i> subsp. <i>californicum</i> (Colwell 97-CA-BLO) | MG954027 | Schneider et al. 2016 | Sanger   | WTU344755          |
| <i>A. californicum</i> subsp. <i>condensum</i> (Taylor 18565)         | MG954028 | Schneider et al. 2016 | Sanger   | JEPS100410         |
| <i>A. “franciscanum”</i> (Colwell 01-95)                              | MG954029 | Schneider et al. 2016 | Sanger   | WTU351381          |
| <i>A. “franciscanum”</i> (Schneider 920)                              | MG954030 | Schneider et al. 2016 | Sanger   | JEPS122893         |
| <i>A. “franciscanum”</i> (Egger 1295)                                 | MG954031 | Schneider et al. 2016 | Sanger   | WTU                |
| <i>Orobanche hederæ</i> (Schneider 124)                               | MG954057 | Schneider et al. 2016 | Illumina | JEPS121581         |
| <i>A. ludovicianum</i> (Collins 2033)                                 | MG954032 | Schneider et al. 2016 | Sanger   | UC 2046173<br>ARIZ |
| <i>A. sp. nov.</i> (Yatskyevich 85-215)                               | MG954033 | Schneider et al. 2016 | Sanger   | 264197             |
| <i>A. multiflorum</i> (Collins 2024)                                  | MG954034 | Schneider et al. 2016 | Sanger   | MO5990497          |
| <i>A. pinorum</i> (Colwell 96-WA-LC)                                  | MG954035 | Schneider et al. 2016 | Sanger   | WTU344760          |
| <i>A. riparium</i> (Collins 1620)                                     | MG954036 | Schneider et al. 2016 | Sanger   | MO4903216          |
| <i>A. uniflorum</i> (Anderson 2267)                                   | MG954037 | Schneider et al. 2016 | Sanger   | MIN409677          |
| <i>A. validum</i> subsp. <i>validum</i> (Colwell 99-73)               | MG954038 | Schneider et al. 2016 | Sanger   | WTU344847          |



**Supplementary Material** for Schneider *et al.* (2018)

— Punctuated plastome reduction and host-parasite horizontal gene transfer in the holoparasitic plant genus *Aphyllon* —  
*Proceedings of the Royal Society B*, doi:10.1098/rspb.2018.1535

|                  |          |         |
|------------------|----------|---------|
| Rubia sylvatica  | KP098247 | Genbank |
| Salvia brandegii | AY570398 | Genbank |
| Syringa vulgaris | KM361002 | Genbank |
| G. album         | X81090   | Genbank |
| G. corsicum      | X81096   | Genbank |
| G. elongatum     | X81098   | Genbank |
| G. lucidum       | X81100   | Genbank |
| G. palustre      | X81101   | Genbank |
| G. scabrum       | X81105   | Genbank |
